# Supplementary figures and images for: Primosomal protein PriC rescues replication initiation stress by bypassing the DnaA-DnaB interaction step for DnaB helicase loading at oriC
Source: eLife journal article supplement (doi:10.7554/elife.103340), 2024-11-25

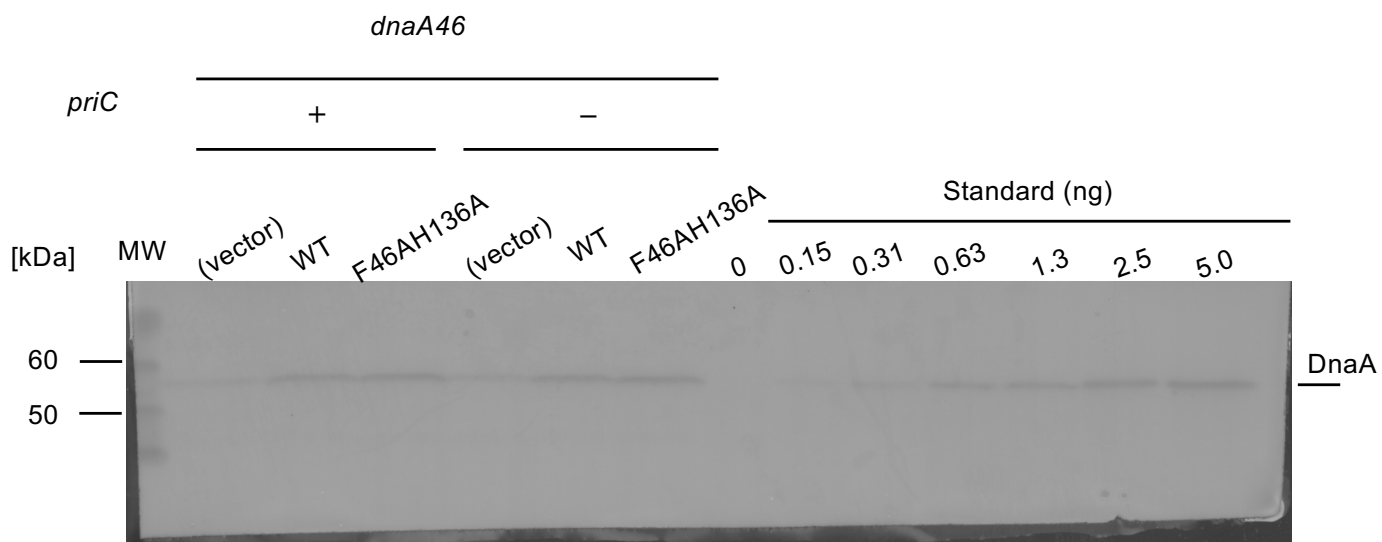

Supplement: fig3-figsupp1-data1 [file Figure 3-figure supplement 1A-source data 1.pdf › Figure 3-figure supplement 1A-source data 1.pdf]

Panel A

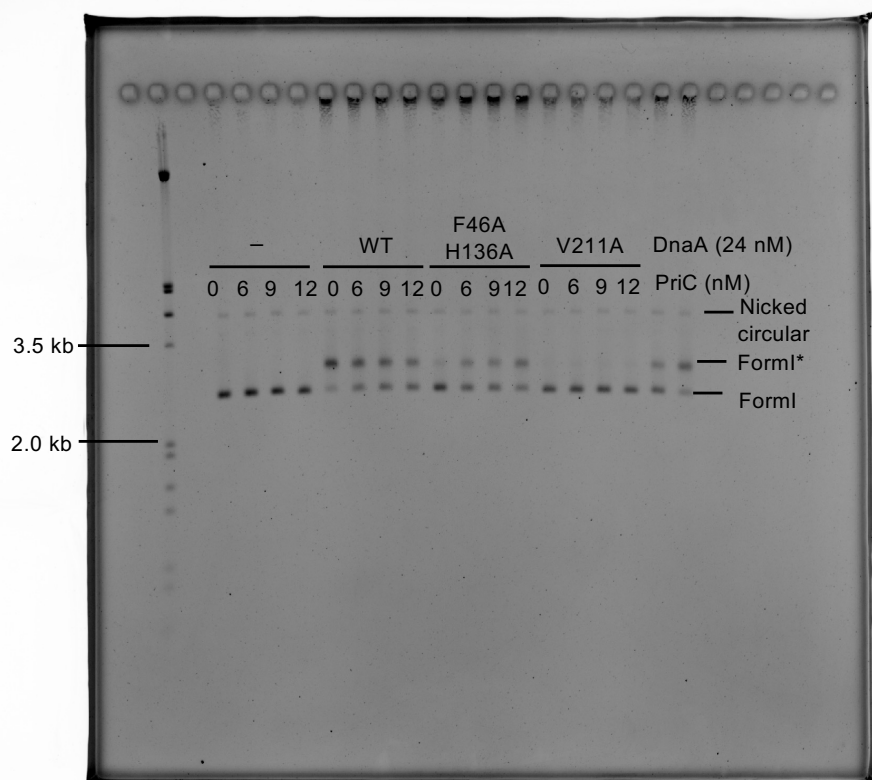

Panel C

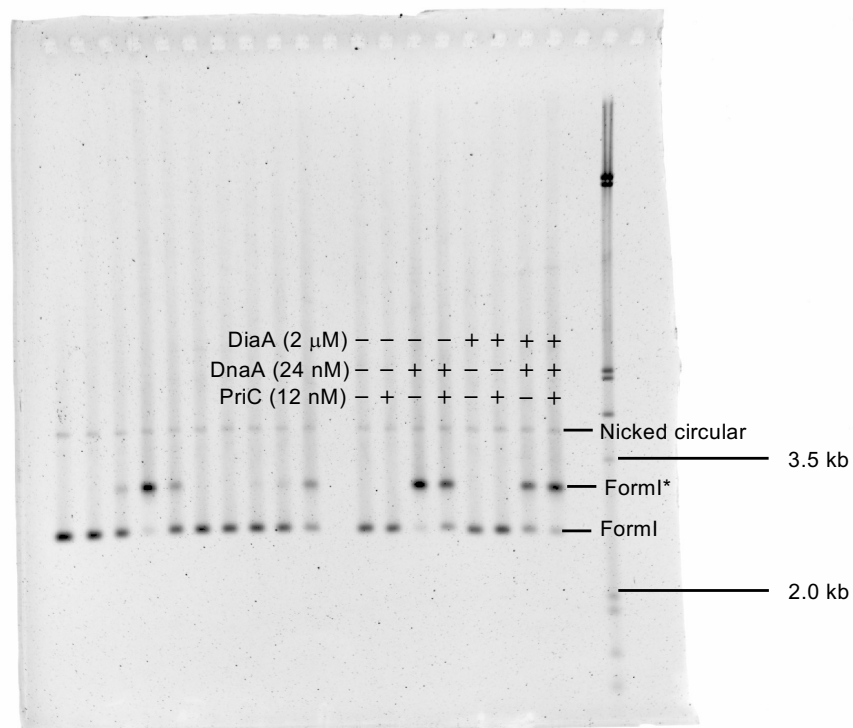

Supplement: fig7-data1 [file elife-103340-fig7-data1-v1.zip]
